# Supplementary material
Source: PubMed Central journal article supplement (PMC3584524)
Supplement: Supp_Fig1.pdf [file Supp_Fig1.pdf]

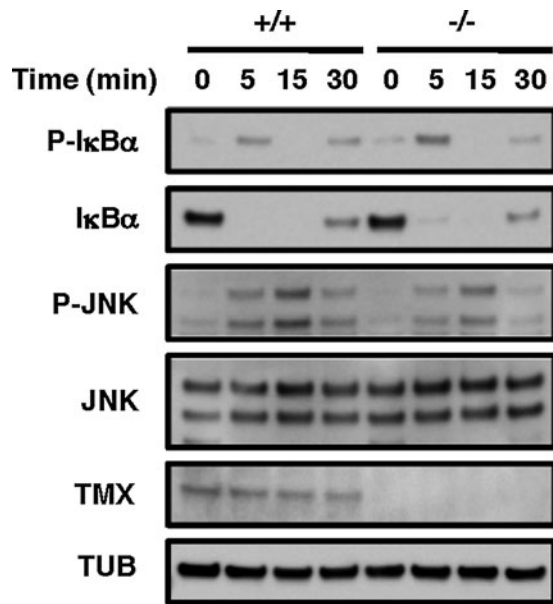

**SUPPLEMENTARY FIG. S1. Activation of TNF- $\alpha$ -signaling mediators is equivalent in wild-type and TMX<sup>-/-</sup> cells.** Tail-tip fibroblasts were treated with 10 ng/ml TNF- $\alpha$  for the indicated times. Cell lysates were prepared and analyzed by immunoblotting with antibodies to I $\kappa$ B- $\alpha$ , JNK, and TMX. P-I $\kappa$ B $\alpha$ , phosphorylated I $\kappa$ B- $\alpha$ ; P-JNK, phosphorylated JNK.  $\alpha$ -tubulin (TUB) was used as a loading control. Similar results were obtained in mouse embryonic fibroblasts. JNK, c-Jun N-terminal kinase; TMX, transmembrane thioredoxin-related protein; TNF- $\alpha$ , tumor necrosis factor- $\alpha$ .
