# Supplementary material
Source: PubMed Central journal article supplement (PMC3584524)
Supplement: Supp_Fig2.pdf [file Supp_Fig2.pdf]

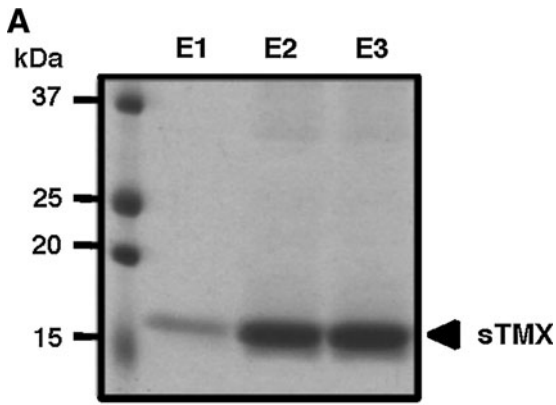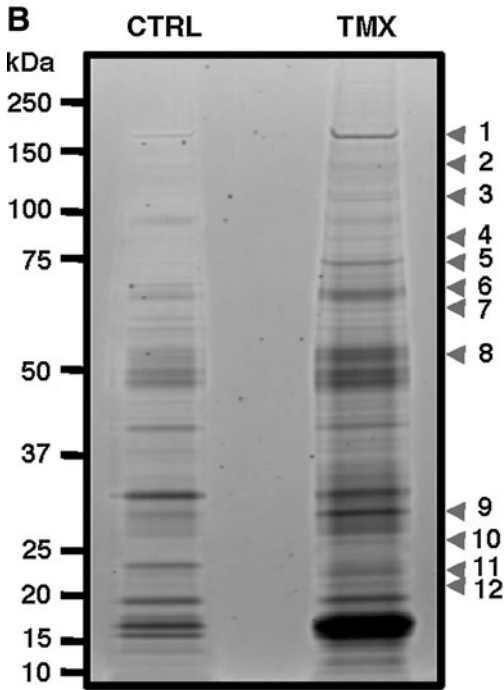

**Fluorescent staining**

**SUPPLEMENTARY FIG. S2. Identification of TMX-binding proteins.** (A) Purification of recombinant TMX proteins. Soluble forms of TMX (sTMX) were purified from culture supernatants using Ni-NTA agarose. Eluted fractions (E1-E3) were analyzed by SDS-PAGE, followed by Coomassie staining. (B) Proteins were affinity purified from mouse liver membrane fractions using control (CTRL) or TMX-conjugated magnetic beads, visualized by SDS-PAGE and SYPRO Ruby staining. Protein bands (#1-12) were excised from the gel and analyzed by mass spectrometry. SDS-PAGE, sodium dodecyl sulfate-polyacrylamide gel electrophoresis.
