# Supplementary material
Source: PubMed Central journal article supplement (PMC3584524)
Supplement: Supp_Table1.pdf [file Supp_Table1.pdf]

SUPPLEMENTARY TABLE S1. LIST OF GENES INDUCED BY LIPOPOLYSACCHARIDE/D-(+)-GALACTOSAMINE

| Gene    | Description                                            | Fold induction          |        |                         |
|---------|--------------------------------------------------------|-------------------------|--------|-------------------------|
|         |                                                        | TMX <sup>-/-</sup> ctrl | WT+LPS | TMX <sup>-/-</sup> +LPS |
| Alox5ap | Arachidonate 5-lipoxygenase activating protein         | 1.6                     | 2.3    | 6.6                     |
| Bax     | Bcl2-associated X protein                              | 1.0                     | 2.2    | 4.5                     |
| Btg3    | B-cell translocation gene 3                            | 1.2                     | 2.5    | 8.2                     |
| Ccl6    | Chemokine (C-C motif) ligand 6                         | 1.4                     | 2.6    | 13.7                    |
| Cd48    | CD48 antigen                                           | 2.7                     | 3.0    | 9.6                     |
| Cd52    | CD52 antigen                                           | 2.1                     | 3.2    | 6.8                     |
| Cd68    | CD68 antigen                                           | 1.5                     | 2.2    | 6.6                     |
| Cdkn1a  | Cyclin-dependent kinase inhibitor 1A (P21)             | 1.1                     | 8.8    | 19.2                    |
| Clec1b  | C-type lectin domain family 1, member b                | 1.9                     | 2.5    | 5.0                     |
| Cyba    | Cytochrome b-245, alpha polypeptide                    | 1.6                     | 2.2    | 6.2                     |
| Ddx39   | DEAD (Asp-Glu-Ala-Asp)-box polypeptide 39              | 1.0                     | 2.5    | 5.3                     |
| Dnajc10 | DnaJ (Hsp40) homolog, subfamily C, member 10           | 2.0                     | 2.1    | 5.9                     |
| Ear10   | Eosinophil-associated ribonuclease A family, member 10 | 2.7                     | 4.1    | 16.7                    |
| Ear2    | Eosinophil-associated ribonuclease A family, member 2  | 2.2                     | 2.7    | 10.1                    |
| Fabp7   | Fatty acid-binding protein 7, brain                    | 2.2                     | 2.2    | 7.6                     |
| Fcer1g  | Fc receptor, IgE, high-affinity I, gamma polypeptide   | 1.5                     | 2.1    | 4.3                     |
| Gadd45b | Growth arrest and DNA-damage-inducible 45 beta         | 1.7                     | 3.1    | 6.2                     |
| Gadd45g | Growth arrest and DNA-damage-inducible 45 gamma        | 1.3                     | 2.3    | 5.7                     |
| Gja1    | Gap-junction membrane channel protein alpha 1          | 2.1                     | 2.6    | 5.9                     |
| Ifi30   | Interferon-gamma-inducible protein 30                  | 1.8                     | 2.7    | 6.6                     |
| Igfbp1  | Insulin-like growth factor-binding protein 1           | 2.2                     | 3.5    | 8.5                     |
| Lpl     | Lipoprotein lipase                                     | 1.4                     | 2.9    | 11.1                    |
| Mlkl    | Mixed lineage kinase domain-like                       | 1.3                     | 2.0    | 8.1                     |
| Nap111  | Nucleosome assembly protein 1-like 1                   | 1.6                     | 2.0    | 6.6                     |
| Oas1a   | 2'-5' oligoadenylate synthetase 1A                     | 2.7                     | 2.6    | 10.0                    |
| Pgm3    | Phosphoglucomutase 3                                   | 2.0                     | 2.1    | 4.9                     |
| Sfpq    | Splicing factor proline/glutamine-rich                 | 2.2                     | 2.1    | 4.2                     |
| Vcam1   | Vascular cell adhesion molecule 1                      | 1.6                     | 2.9    | 9.0                     |

LPS, lipopolysaccharide; TMX, transmembrane thioredoxin-related protein; WT, wild type.
