# Supplementary material
Source: PubMed Central journal article supplement (PMC3584524)
Supplement: Supp_Table3.pdf [file Supp_Table3.pdf]

SUPPLEMENTARY TABLE S3. EXPRESSION OF ANTIOXIDANT GENES IN CONTROL AND LIPOPOLYSACCHARIDE/D-(+)-GALACTOSAMINE-TREATED MICE

| <i>Gene</i>       | <i>Description</i>                | <i>Fold induction</i>         |               |                               |
|-------------------|-----------------------------------|-------------------------------|---------------|-------------------------------|
|                   |                                   | <i>TMX<sup>-/-</sup> ctrl</i> | <i>WT+LPS</i> | <i>TMX<sup>-/-</sup> +LPS</i> |
| Cat               | Catalase                          | 0.9                           | 0.9           | 0.2                           |
| Glr <sub>x</sub>  | Glutaredoxin                      | 1.1                           | 1.1           | 1.6                           |
| Glr <sub>x2</sub> | Glutaredoxin 2                    | 1.1                           | 1.3           | 1.2                           |
| Glr <sub>x3</sub> | Glutaredoxin 3                    | 1.1                           | 1.7           | 1.4                           |
| Glr <sub>x5</sub> | Glutaredoxin 5                    | 0.9                           | 0.9           | 1.0                           |
| Gpx <sub>4</sub>  | Glutathione peroxidase 4          | 0.8                           | 1.1           | 0.9                           |
| Gpx <sub>6</sub>  | Glutathione peroxidase 6          | 0.8                           | 0.7           | 0.4                           |
| Prdx <sub>1</sub> | Peroxiredoxin 1                   | 0.7                           | 0.7           | 0.6                           |
| Prdx <sub>2</sub> | Peroxiredoxin 2                   | 1.0                           | 0.8           | 0.7                           |
| Prdx <sub>3</sub> | Peroxiredoxin 3                   | 1.0                           | 1.4           | 1.3                           |
| Prdx <sub>4</sub> | Peroxiredoxin 4                   | 0.9                           | 0.8           | 0.4                           |
| Prdx <sub>5</sub> | Peroxiredoxin 5                   | 0.9                           | 0.8           | 0.7                           |
| Prdx <sub>6</sub> | Peroxiredoxin 6                   | 0.9                           | 0.8           | 0.4                           |
| Sod <sub>1</sub>  | Superoxide dismutase 1, Cu/Zn-SOD | 0.9                           | 0.8           | 0.4                           |
| Sod <sub>2</sub>  | Superoxide dismutase 2, Mn-SOD    | 1.0                           | 1.0           | 0.6                           |
| Txn <sub>1</sub>  | Thioredoxin 1                     | 0.7                           | 1.1           | 0.8                           |
| Txn <sub>2</sub>  | Thioredoxin 2                     | 0.8                           | 0.9           | 0.6                           |
