# Supplementary material
Source: PubMed Central journal article supplement (PMC3584524)
Supplement: Supp_Table4.pdf [file Supp_Table4.pdf]

SUPPLEMENTARY TABLE S4. POLYMERASE CHAIN  
REACTION PRIMERS

| <i>Primers</i> | <i>Sequence (5' ( 3')</i> |
|----------------|---------------------------|
| p21-FW         | AGGCAGACCAGCCTGACAGATTTC  |
| p21-RV         | AGAGTGAGGGCTAAGGCCGAAGAT  |
| Bax-FW         | TGATTGCTGACGTGGACACGGA    |
| Bax-RV         | ACAGGGCCTTGAGCACCAGTTT    |
| Gadd45g-FW     | CCGCCAAAGTCCTGAATGTGGAC   |
| Gadd45g-RV     | CGTTCTCACAGCAGAACGCCTGA   |
| S100A8-FW      | CTGAGTGTCTCAGTTTGTGCAGAA  |
| S100A8-RV      | ACATATCCAGGGACCCAGCCCT    |
| AnxaA1-FW      | AACCATCGTGAAGTGTGCCACCAG  |
| AnxaA1-RV      | TGTCAATTTCCGAACGGGAGACCA  |
| 18S rRNA-FW    | AATTGACGGAAGGGCACCACCA    |
| 18S rRNA-RV    | TAAGAACGGCCATGCACCACCA    |
